# Supplementary material for: Groundwater recharge processes in an Asian mega-delta: hydrometric evidence from Bangladesh
Source: Springer Nature journal article supplement (doi:10.1007/s10040-020-02238-3), 2020-10-07
Supplement: MOESM1 [file 18460196]

**Groundwater recharge processes in an Asian mega-delta:  
hydrometric evidence from Bangladesh**

**Sara Nowreen<sup>1,2\*</sup>, R.G. Taylor<sup>1</sup>, M. Shamsudduha<sup>1,3</sup>, M. Salehin<sup>2</sup>, A. Zahid<sup>4</sup>, K.M. Ahmed<sup>5</sup>**

<sup>1</sup>Department of Geography, University College London, London, UK

<sup>2</sup>Institute of Water & Flood Management, Bangladesh University of Engineering and Technology, Dhaka, Bangladesh

<sup>3</sup>Department of Geography, University of Sussex, Brighton, UK

<sup>4</sup>Bangladesh Water Development Board, Green Road, Dhaka, Bangladesh

<sup>5</sup>Department of Geology, University of Dhaka, Dhaka, Bangladesh

**\*Corresponding author:**

Sara Nowreen (snowreen@iwfm.buet.ac.bd)

Telephone: +88 02 966 5650, ext. 6331

**Electronic supplementary material – Hydrogeology Journal**

**Table S1.** Historical (1987-2015) extreme rainfall event statistics of nearby BWDB's rainfall observation stations.

| <b>Extreme Rainfall index</b> | <b>Unit</b> | <b>Description of index</b>                                                                   | <b>Bhuapur Rainfall station (Rajshahi) [median]</b> | <b>Savar Rainfall station (Dhaka) [median]</b> | <b>Bhuapur Site Field Test Period (2009-2010)</b> | <b>Savar Site Field Test Period (2009-2010)</b> |
|-------------------------------|-------------|-----------------------------------------------------------------------------------------------|-----------------------------------------------------|------------------------------------------------|---------------------------------------------------|-------------------------------------------------|
| RX1day                        | mm          | 1-day maximum rainfall in a year                                                              | 120                                                 | 122                                            | 54                                                | 320                                             |
| RX5day                        | mm          | 5-day maximum rainfall in a year                                                              | 222                                                 | 230                                            | 113                                               | 365                                             |
| PRCPTOT                       | mm          | Annual total rainfall                                                                         | 1771                                                | 1925                                           | -                                                 | -                                               |
| R99p                          | mm          | Annual total rainfall when rainfall > 99 <sup>th</sup> percentile of 1987-2015 daily rainfall | 221                                                 | 263                                            | -                                                 | -                                               |
| R95p                          | mm          | Annual total rainfall when rainfall > 95 <sup>th</sup> percentile of 1987-2015 daily rainfall | 474                                                 | 500                                            | -                                                 | -                                               |
| SDII                          | mm/day      | Annual total rainfall divided by the number of wet days                                       | 17                                                  | 17                                             | -                                                 | -                                               |
| R10mm                         | days        | Total number of days in a year with rainfall > 10 mm                                          | 52                                                  | 57                                             | -                                                 | -                                               |
| R20mm                         | days        | Total number of days in a year with rainfall > 20 mm                                          | 30                                                  | 32                                             | -                                                 | -                                               |
| CWD                           | days        | Maximum number of consecutive wet days (rainfall > 0) in a year                               | 11                                                  | 12                                             | -                                                 | -                                               |

**Table S2.** Dominant factors considered for the physical interpretation of cluster patterns.

| <b>Factors / Categories</b>                              | <b>Low</b>               | <b>Moderate</b> | <b>High</b>                  |
|----------------------------------------------------------|--------------------------|-----------------|------------------------------|
| Irrigation Abstraction ( $Q$ ), mm (depth per unit area) | $Q \leq 150$             | $350 > Q > 150$ | $Q \geq 350$                 |
| Upper Silt-clay thickness ( $d$ ), m                     | $d \leq 10$              | $20 > d > 10$   | $d \geq 20$                  |
| Land Classification by Flood Phase <sup>a</sup>          | F3: 1.8 - 3m<br>F4: > 3m | F2: 0.9 - 1.8m  | F0: < 0.3m<br>F1: 0.3 - 0.9m |

<sup>a</sup> Codes derive from Brammer (1988) classifying land in Bangladesh into five types of flood inundation depths: F0 (very high land having flood depth up to 0.3 m), F1 (high land having flood depth varying between 0.3 m and 0.9 m), F2 (medium land having flood depth varying between 0.9 m and 1.8 m), F3 (low land having flood depth varying between 1.2 m and 3.6 m) and F4 (very low land having flood depth more than > 3 m).

**Table S3.** A plausible physical interpretation of the cluster patterns with respect to the dominant factors mentioned in Table S2.

| Cluster Category<br>(Most common pattern)                                      | Statistics<br>of<br>Agreement | Irrigational<br>abstraction | Upper<br>Silt-Clay<br>thickness | Land types by<br>Flood Phase               | Generalised<br>Comment                                                                                          |
|--------------------------------------------------------------------------------|-------------------------------|-----------------------------|---------------------------------|--------------------------------------------|-----------------------------------------------------------------------------------------------------------------|
| CL1<br>(Slight GWL<br>declination with no<br>change in seasonality)            | 15%                           | Low                         | Low                             | Mixed<br>(F0/F1 dominates<br>50% of wells) | 1.Low to<br>moderate<br>abstraction<br>2.Any thickness<br>of silt-clay<br>3.Mixed land<br>types                 |
|                                                                                | 12%                           | Low                         | Moderate                        | Mixed                                      |                                                                                                                 |
|                                                                                | 10%                           | Low                         | High                            | Mixed                                      |                                                                                                                 |
|                                                                                | 27%                           | Moderate                    | Low                             | Mixed<br>(F0/F1 dominates<br>55% of wells) |                                                                                                                 |
|                                                                                | 18%                           | Moderate                    | Moderate                        | Mixed                                      |                                                                                                                 |
|                                                                                | 15%                           | Moderate                    | High                            | Mixed                                      |                                                                                                                 |
| CL 2<br>(Slight GWL<br>declination with slight<br>decrease in seasonality)     | 15%                           | Low                         | Moderate                        | Mixed<br>(F0/F1 dominates<br>40% of wells) | 1.Low to<br>moderate<br>abstraction<br>2.Any thickness<br>of silt-clay<br>3.Mixed land<br>types                 |
|                                                                                | 12%                           | Low                         | High                            | Mixed                                      |                                                                                                                 |
|                                                                                | 22%                           | Moderate                    | Moderate                        | Mixed                                      |                                                                                                                 |
|                                                                                | 32%                           | Moderate                    | Low                             | Mixed                                      |                                                                                                                 |
| CL 3<br>(High GWL<br>declination with<br>diminishing seasonality)              | 25%                           | High                        | High                            | F0                                         | 1.Moderate to<br>high abstraction<br>2.Moderate to<br>high thickness of<br>silt-clay<br>3.F0 type land          |
|                                                                                | 9%                            | High                        | Moderate                        | F0                                         |                                                                                                                 |
|                                                                                | 16%                           | Moderate                    | Moderate                        | F0                                         |                                                                                                                 |
|                                                                                | 32%                           | Moderate                    | High                            | F0                                         |                                                                                                                 |
| CL 4<br>(Moderate GWL<br>declination with moderate<br>decrease in seasonality) | 12%                           | High                        | Low                             | F0 mixed with F1                           | 1.Moderate<br>abstraction<br>2.Any thickness<br>of silt-clay<br>3.Mostly F0<br>mixed with F1<br>type land       |
|                                                                                | 36%                           | Moderate                    | High                            | F0 mixed with F1                           |                                                                                                                 |
|                                                                                | 38%                           | Moderate                    | Low                             | F0 mixed with F1                           |                                                                                                                 |
| CL 5<br>(Slight GWL<br>declination with increase<br>in seasonality)            | 22%                           | High                        | Low                             | Mixed                                      | 1.Moderate to<br>high abstraction<br>2.Low thickness<br>of silt-clay<br>3.Mostly F2 or<br>mixed type of<br>land |
|                                                                                | 16%                           | Moderate                    | High                            | F2 mixed with<br>F3/F4                     |                                                                                                                 |
|                                                                                | 60%                           | Moderate                    | Low                             | F2 Mixed with F1                           |                                                                                                                 |

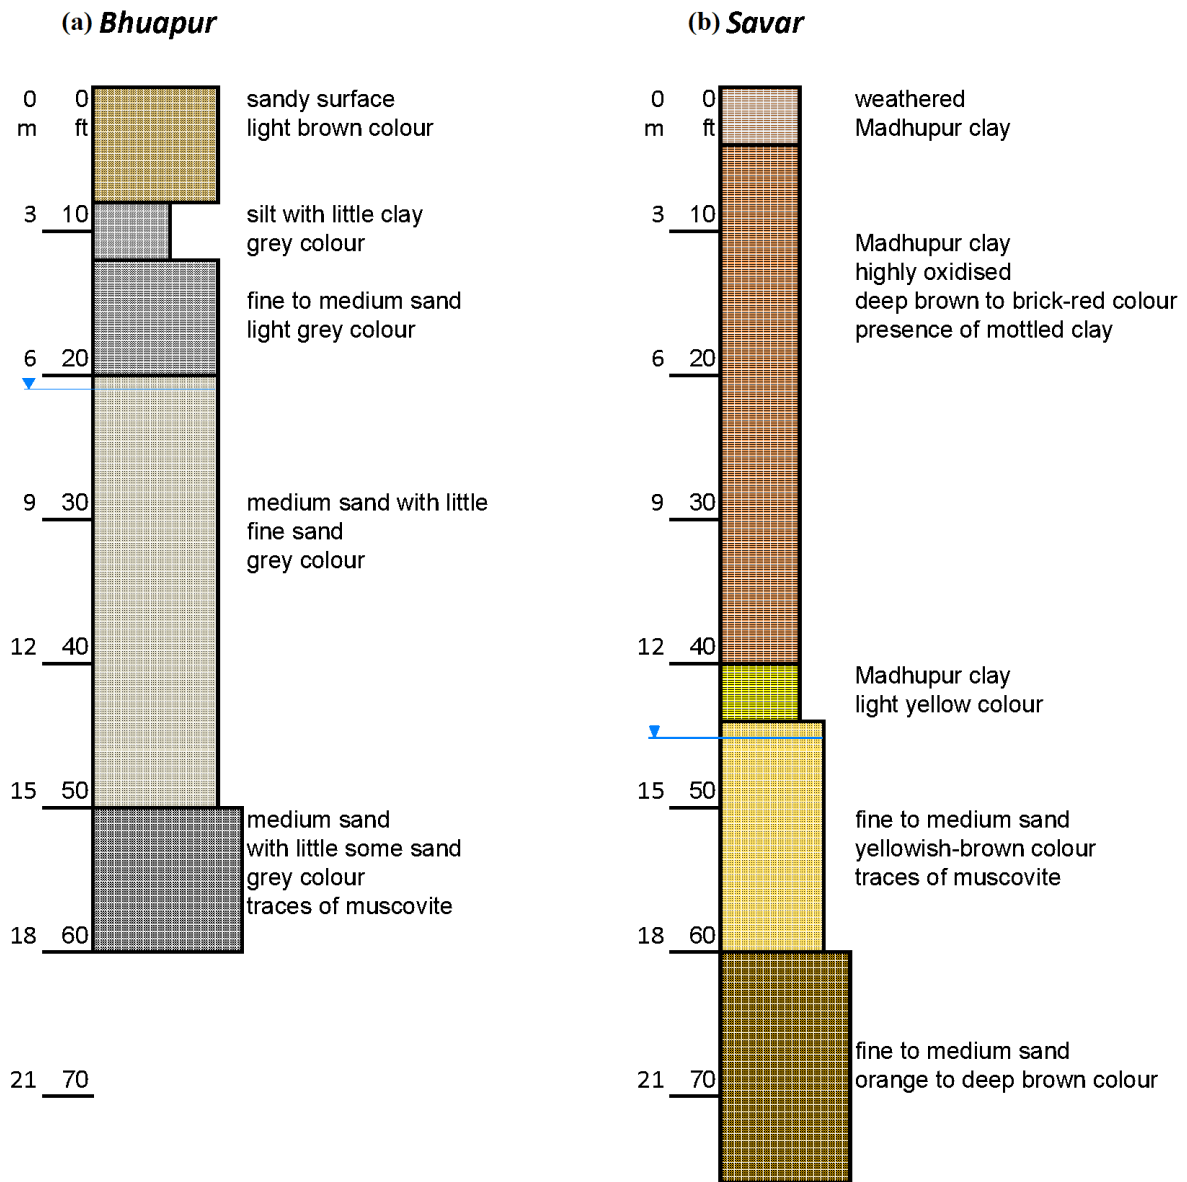

**Fig. S1** (a) Detailed borehole lithological records at Bhuapur and (b) Savar sites as recorded from drilled core samples.

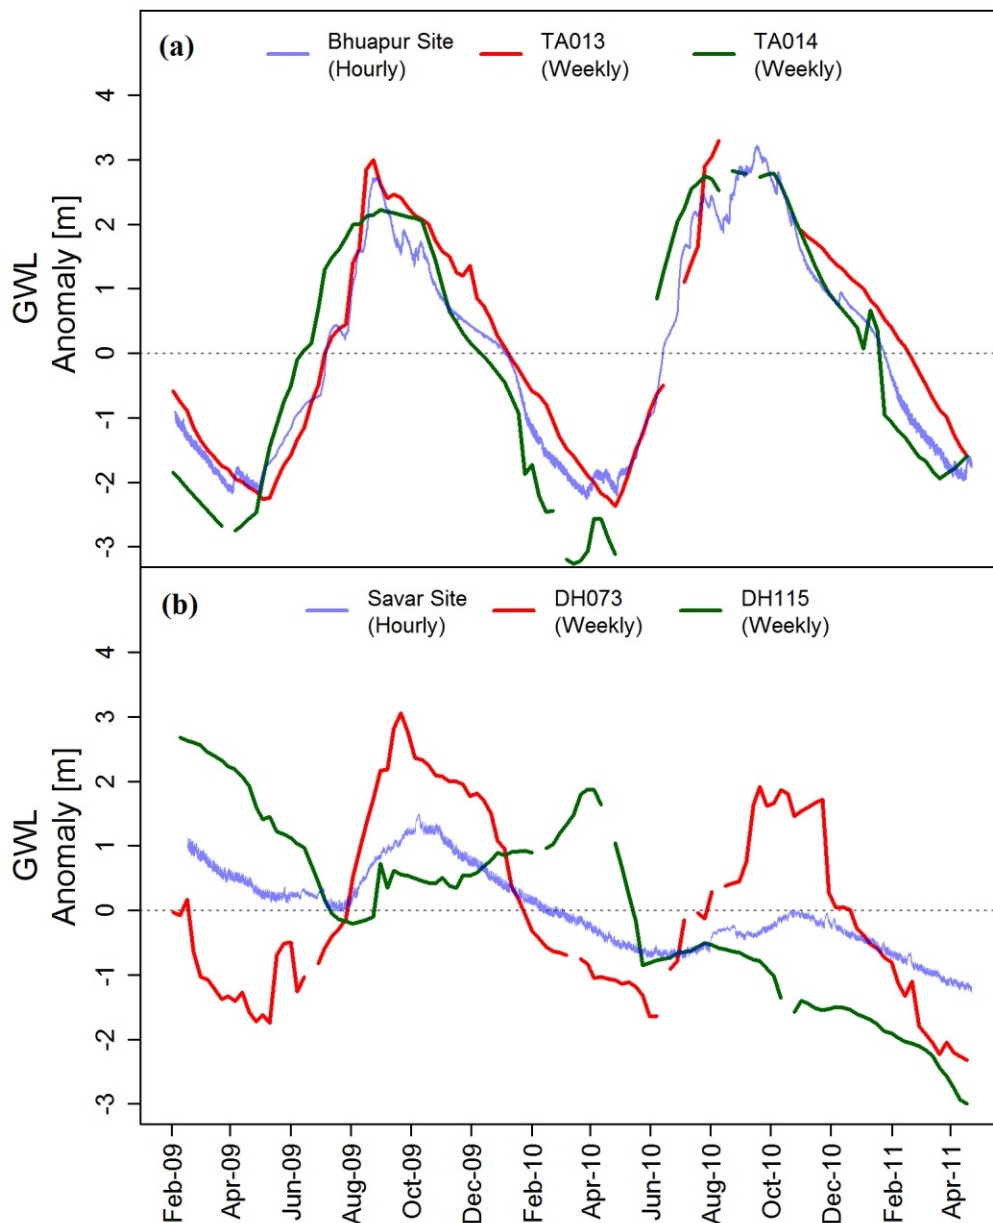

**Fig. S2** (a) Hydrographs showing anomalies over 2 years (2009-2011) with respect to mean high-frequency (hourly) groundwater-level monitoring records and weekly groundwater-level records from the closest BWDB stations at Bhuapur and (b) Savar site, respectively.

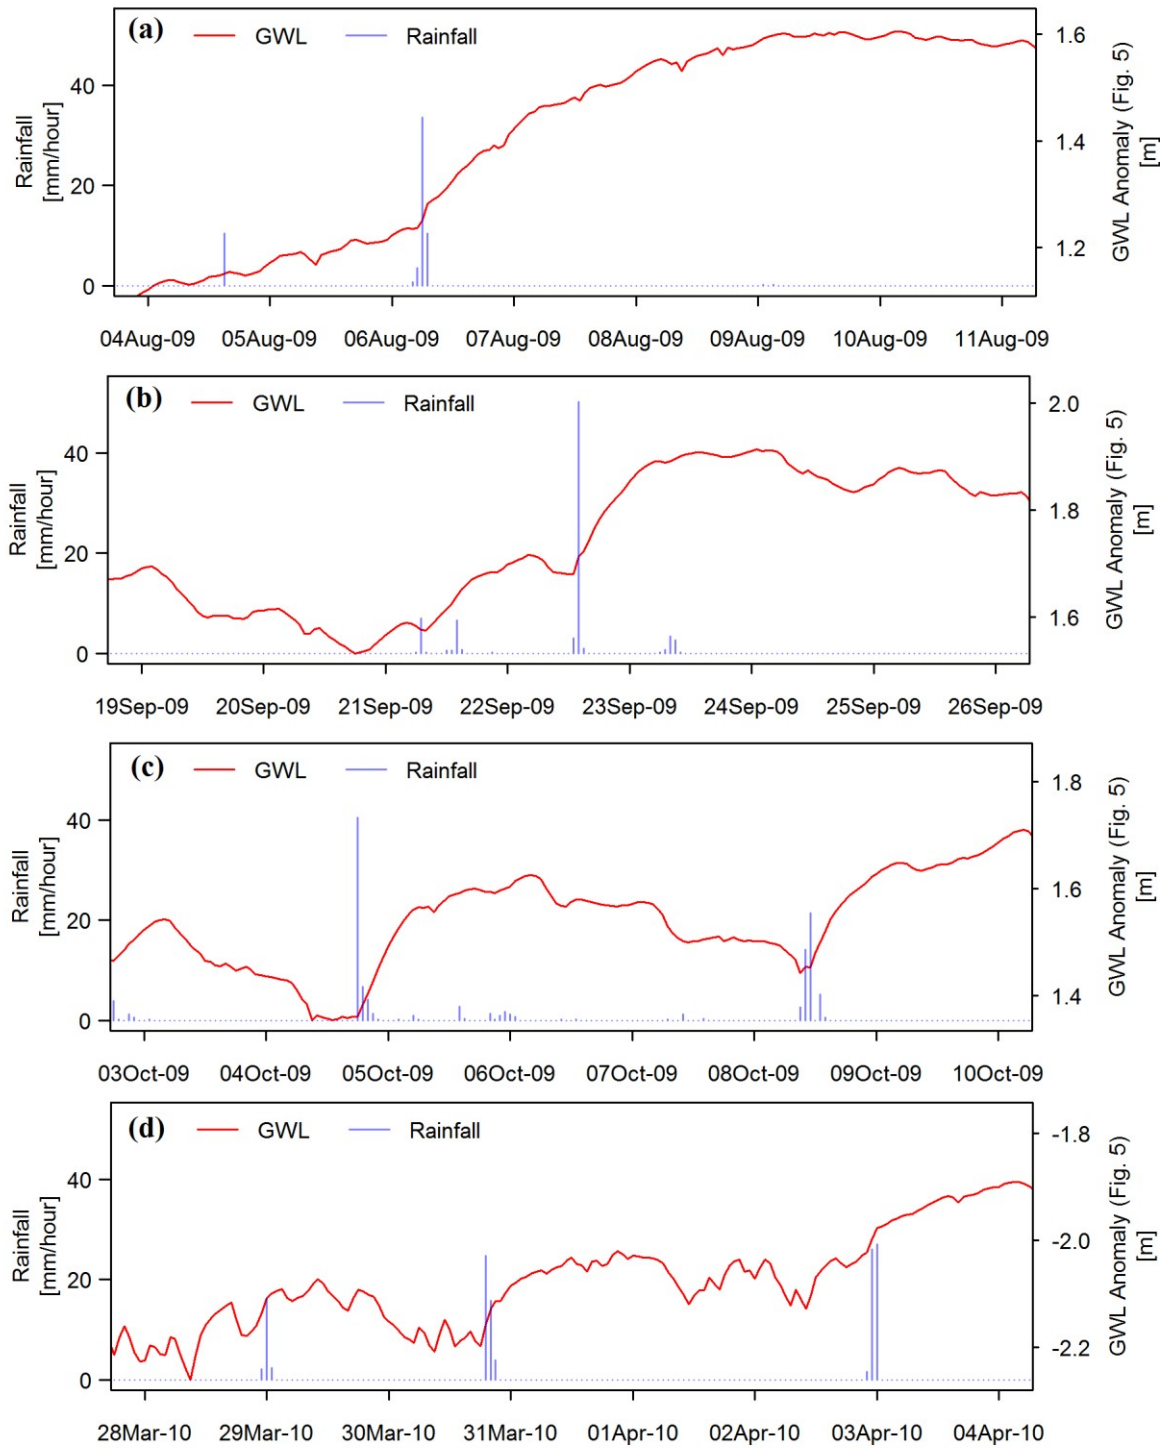

**Fig. S3** Line plots show anomalies of groundwater levels and bar plots display corresponding recorded heavy rainfall events at Bhuapur: (a) 4 to 11 August 2009; (b) 19 to 26 September 2009; (c) 3 to 10 October 2009; and (d) 28 March to 4 April 2010.

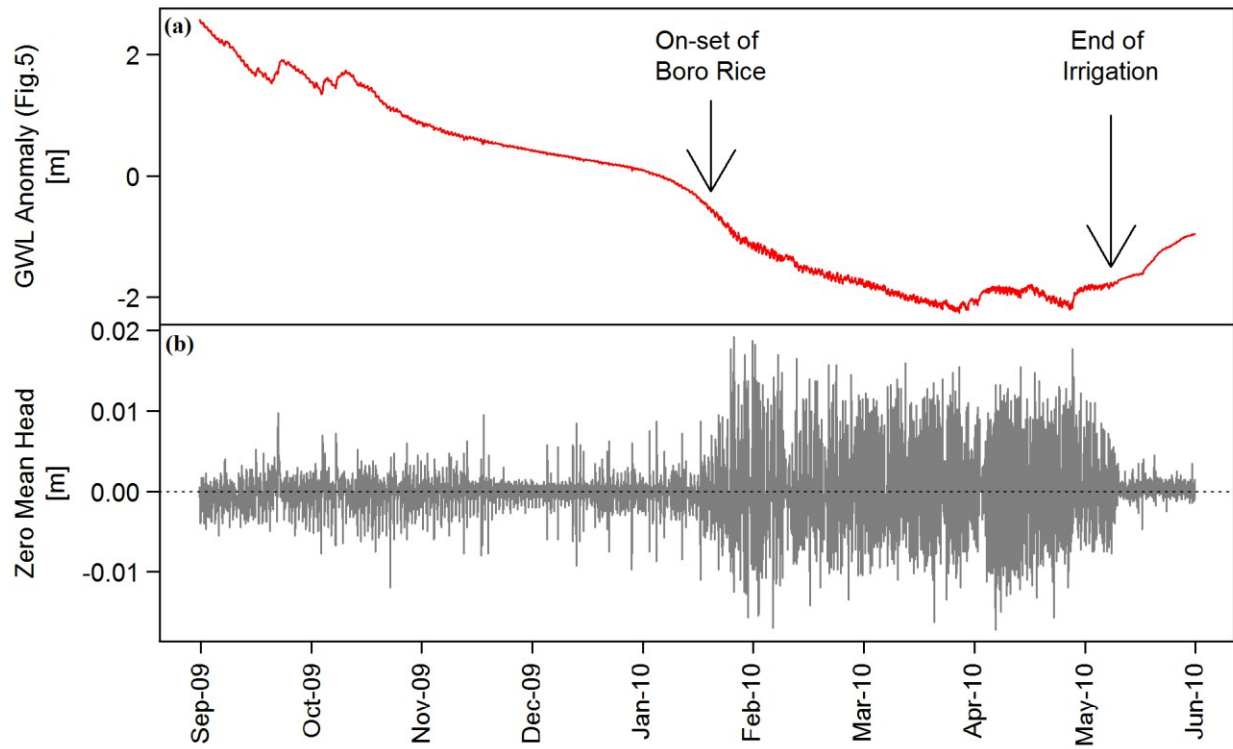

**Fig. S4** (a) Hydrograph showing a recession period highlighted in Fig. 5 (d) at Bhuapur site: hourly, corrected groundwater levels for barometric pressure, and (b) hourly fluctuations in groundwater levels, calculated by subtracting a 1-hr moving average from the observed groundwater levels shown in panel (a).



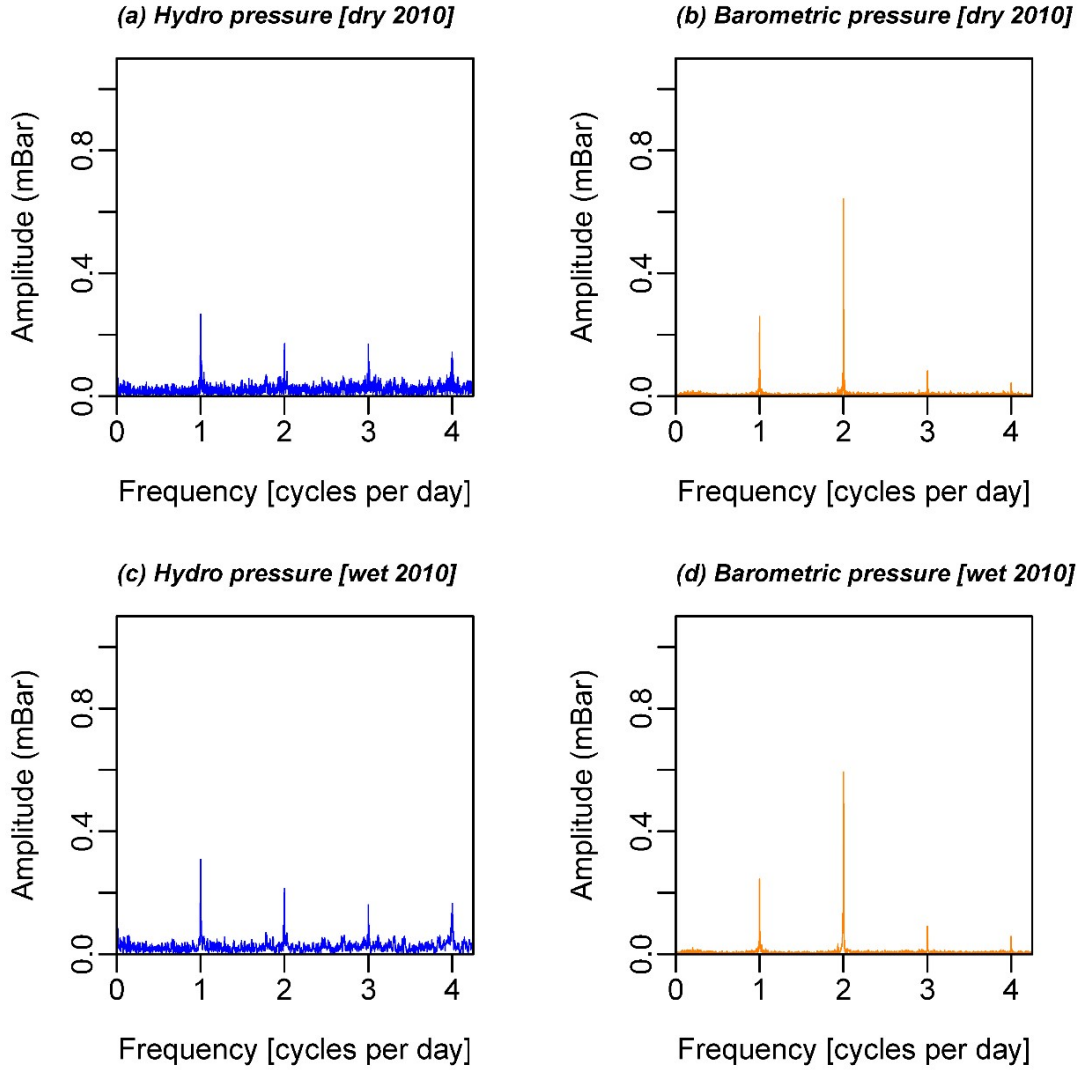

**Fig. S5** Dominant modes or frequencies and their corresponding amplitudes in the observed hydrostatic (blue) and atmospheric or barometric (orange) pressure at Bhuapur site during (a and b) dry and (c and d) wet seasons revealed by an analysis of the Fast Fourier transform (FFT) algorithm in R programming language.

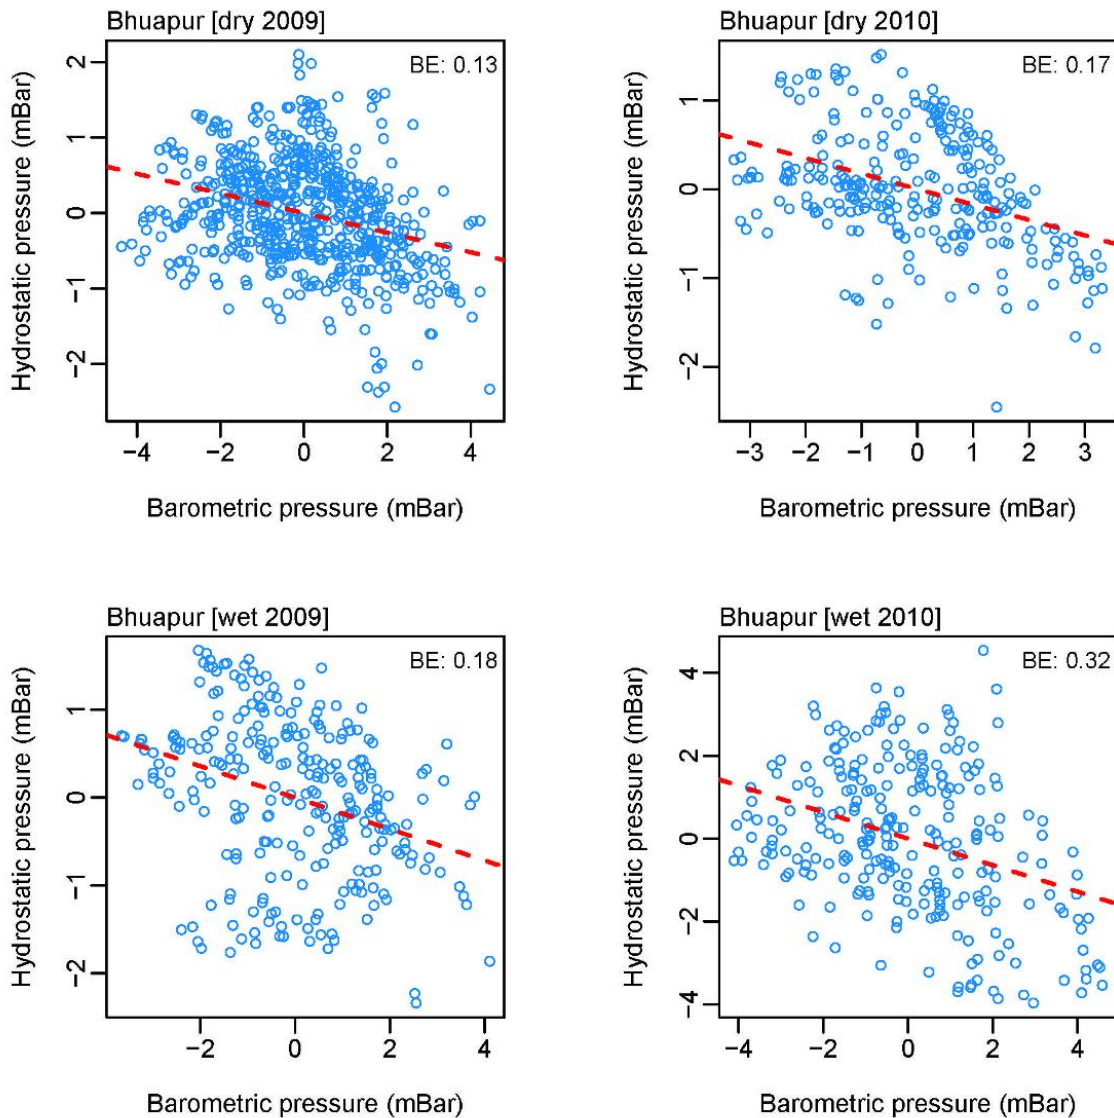

**Fig. S6.** Barometric efficiency (BE) determined from weak but statistically significant ( $p < 0.001$ ) the inverse relationship between barometric pressure and groundwater pressure and the values of the linear regression slope at Bhuapur site during 2009 wet and dry season (left panel) and 2010 (right panel); computed values (13% to 32%) are similar to the BE (36%) computed from the ratio of the S2 signal in groundwater levels and barometric pressure (Fig. S5) following the method of Acworth et al. (2015).

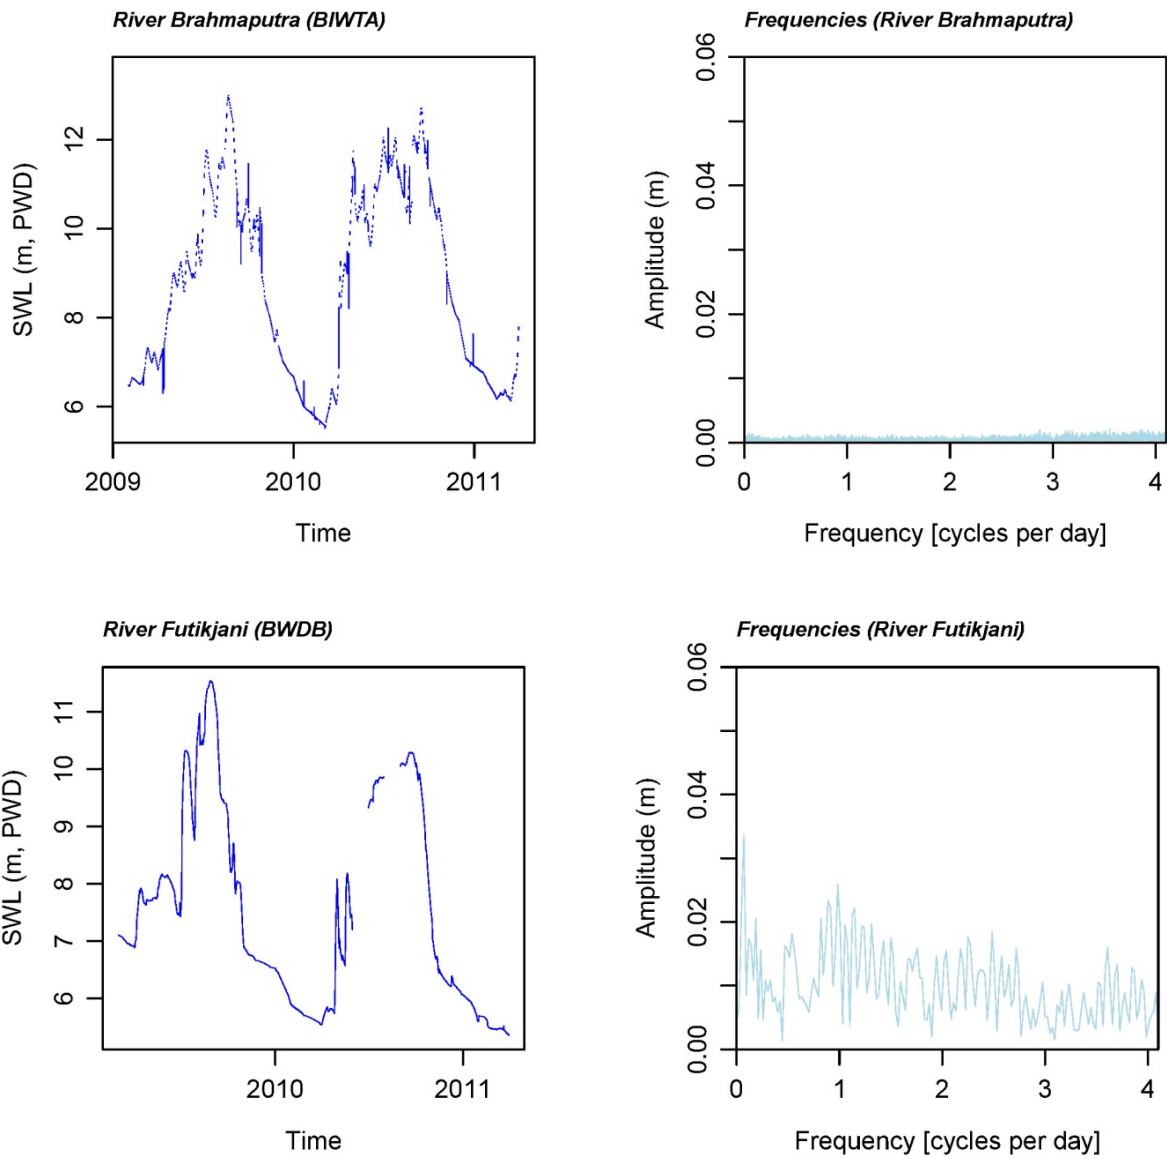

**Fig. S7.** Dominant modes or frequencies and their corresponding amplitudes in the surface water-level time-series records at Bhuapur site (top: hourly records from River Brahmaputra; bottom: daily records from River Futikjani) have been revealed by an analysis of the Fast Fourier transform (FFT) algorithm in R programming language.

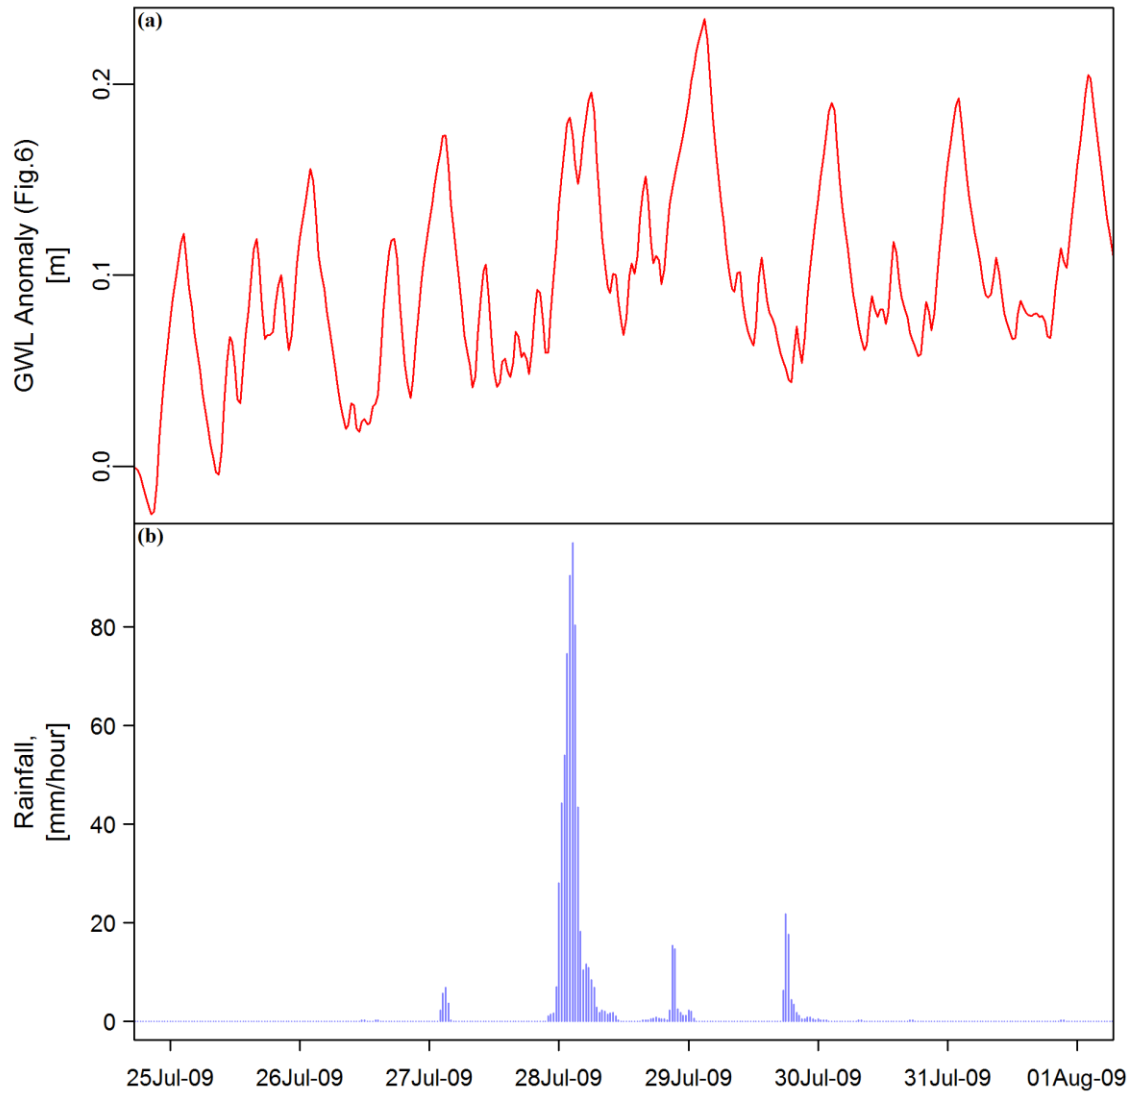

**Fig. S8.** High-frequency groundwater-level anomalies (a) and rainfall including an extreme rainfall event (320 mm on 28 July 2009) as shown in Fig. 6 (e) at Savar site.

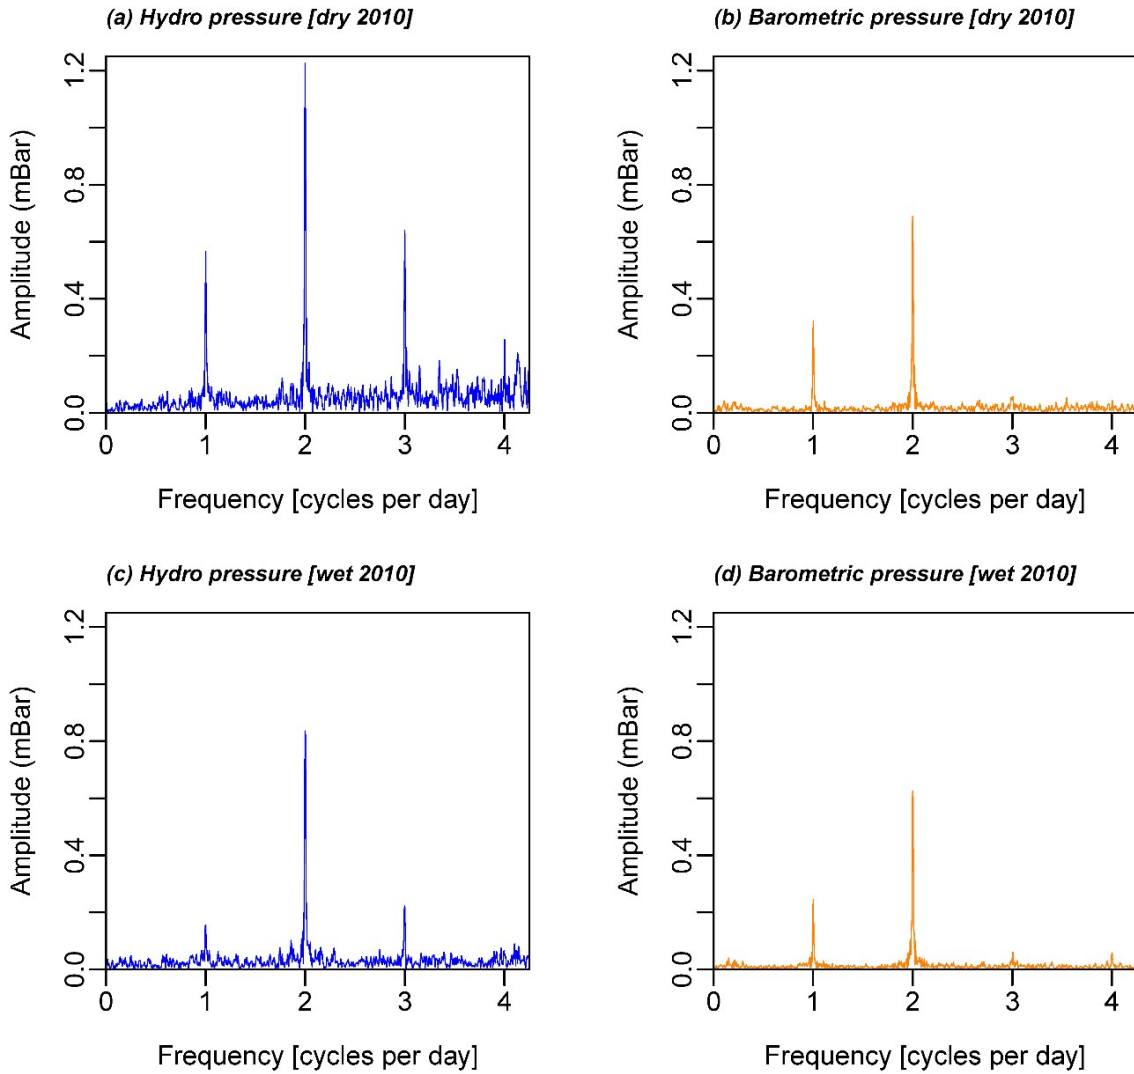

**Fig. S9.** Dominant modes or frequencies and their corresponding amplitudes in the observed hydrostatic (blue) and barometric (orange) pressure at Savar site during (a and b) dry and (c and d) wet seasons revealed by an analysis of the Fast Fourier transform (FFT) algorithm in R programming language.

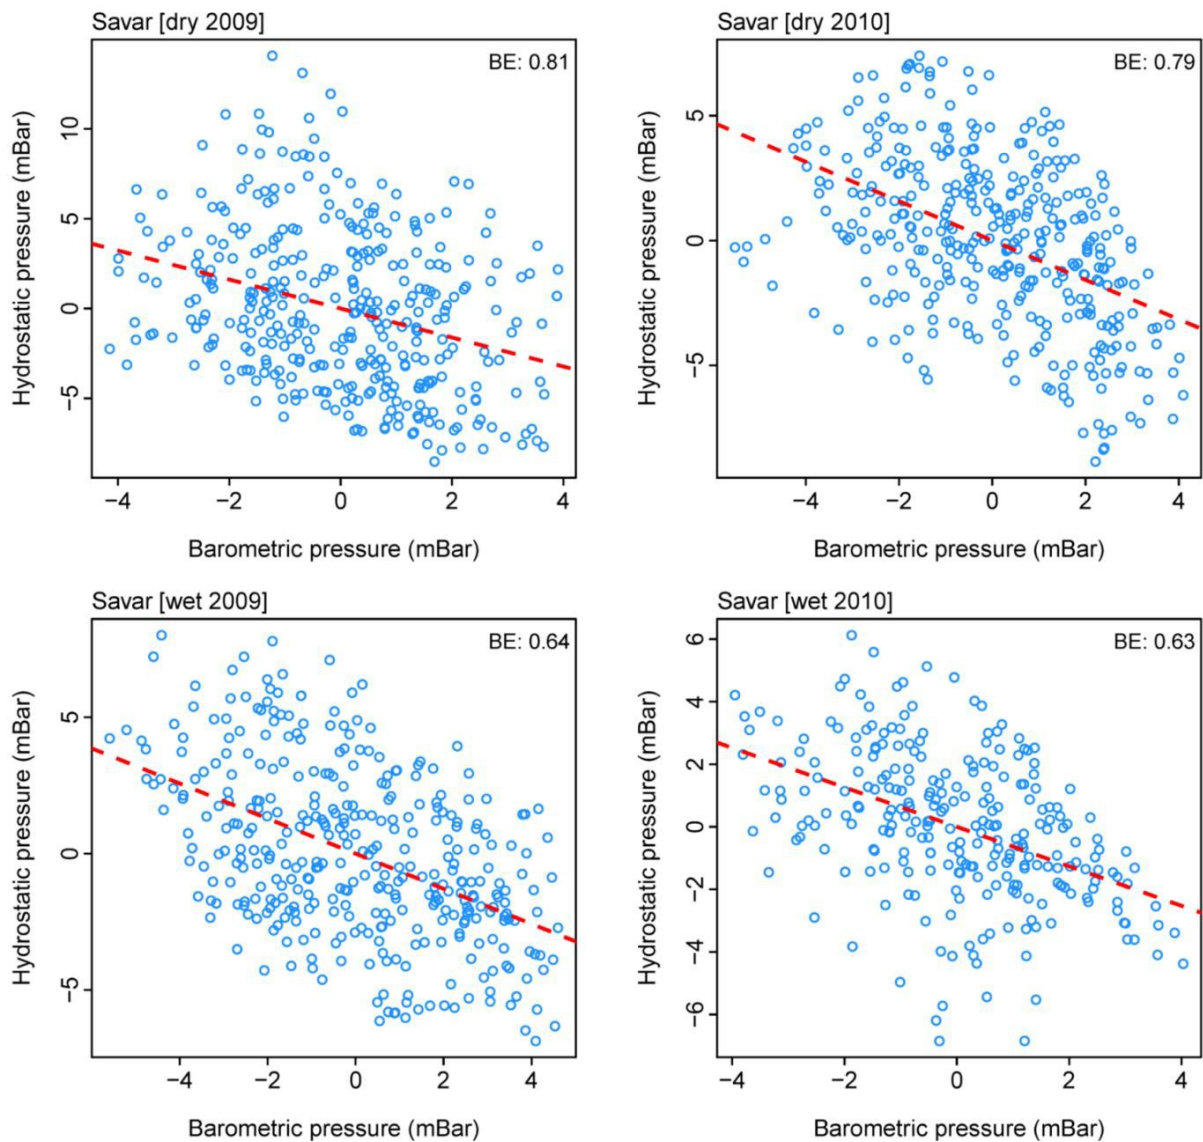

**Fig. S10.** Barometric efficiency (BE) determined from weak but statistically significant ( $p < 0.001$ ) the inverse relationship between barometric pressure and groundwater pressure and the values of the linear regression slope at Savar site during 2009 wet and dry season (left panel) and 2010 (right panel); computed values (63% to 81%), substantially greater than the BE at Bhuapur, are consistent with the value of  $>100\%$ , likely influenced by diurnal pumping, that is computed from the ratio of the S2 signal in groundwater levels and barometric pressure (Fig. S9) following the method of Acworth et al. (2015) .

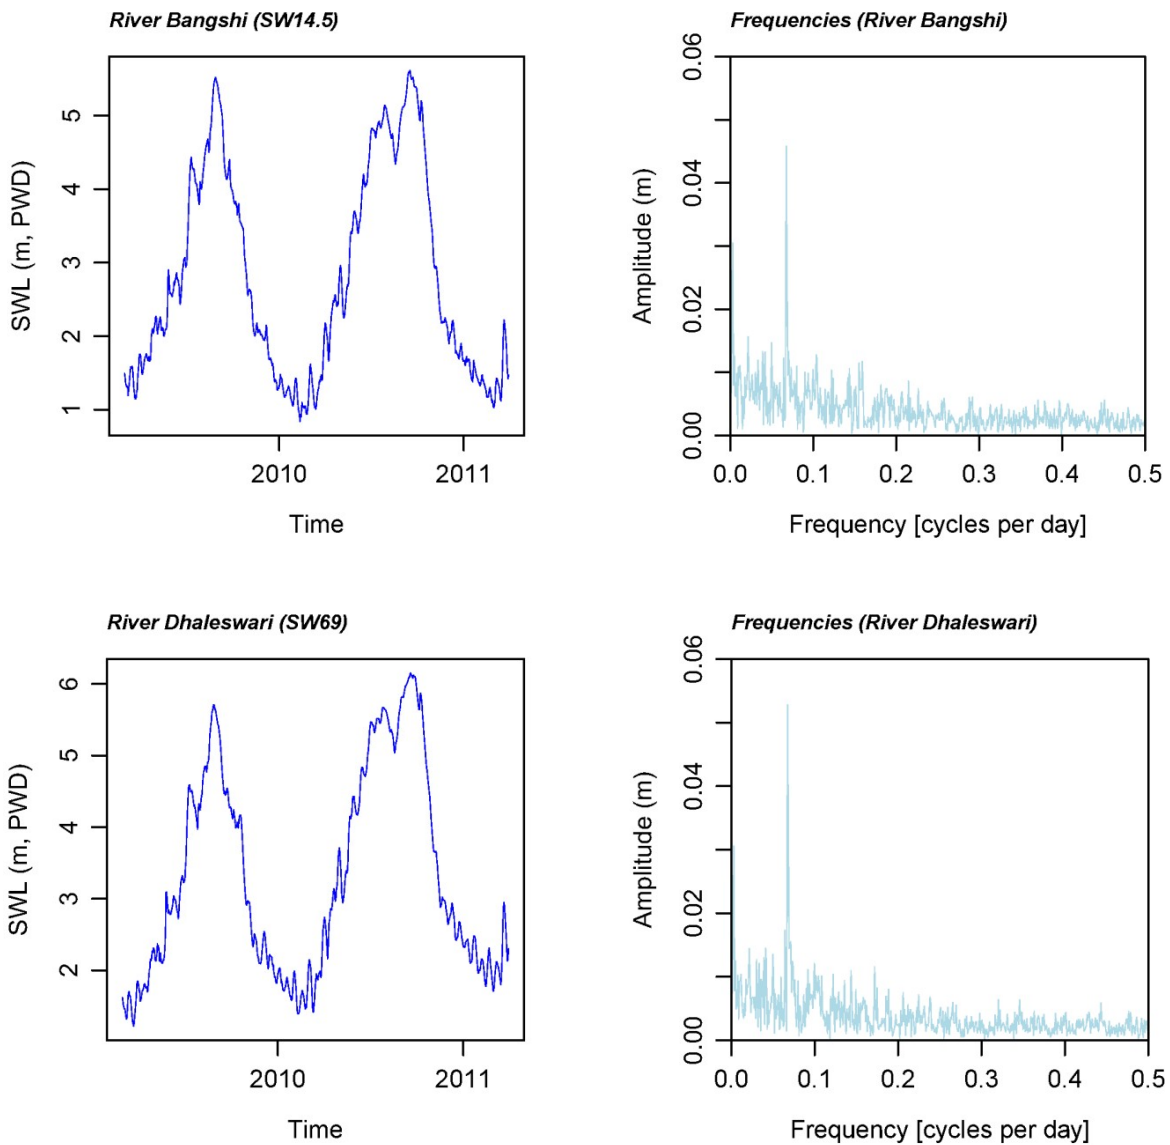

**Fig. S11.** Dominant modes or frequencies and their corresponding amplitudes in the surface water-level time-series records in Savar site (top: daily records from River Bangshi; bottom: daily records from River Dhaleswari) have been revealed by an analysis of the Fast Fourier transform (FFT) algorithm in R programming language.

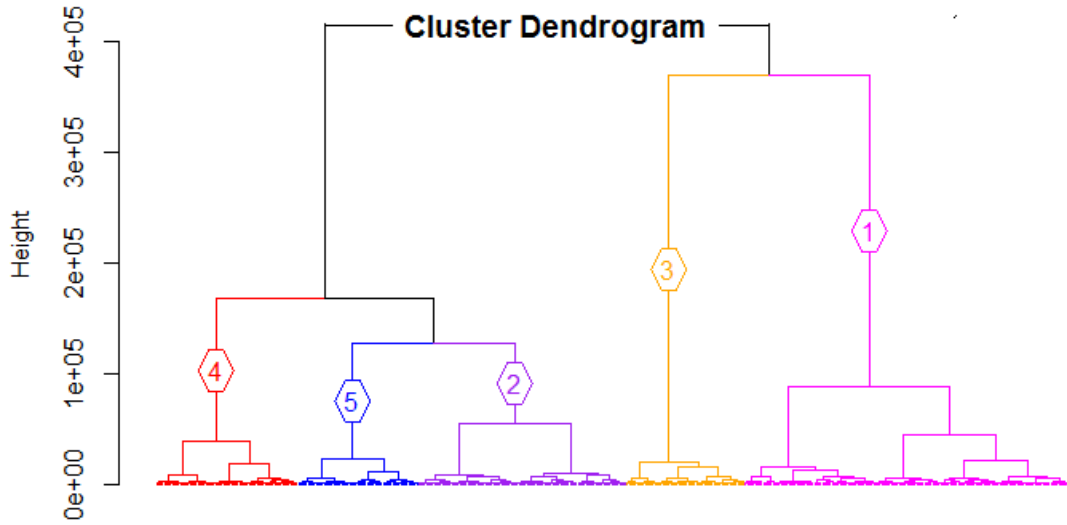

**Figure S12.** Cluster dendrogram formed by the hierarchical method (i.e., Canberra dissimilarity measure for Ward.D2 Linkage cut at cluster numbers  $k=5$ ) of groundwater time series for the period 1994-2013; the height of each U-shaped lines on the vertical axis, represents the distance between the data points being connected so that the higher the height of the branch (i.e., U shaped lines), the less similar the observations are. Note that, the proximity of two observations along the horizontal axis cannot be taken as similarity criteria.



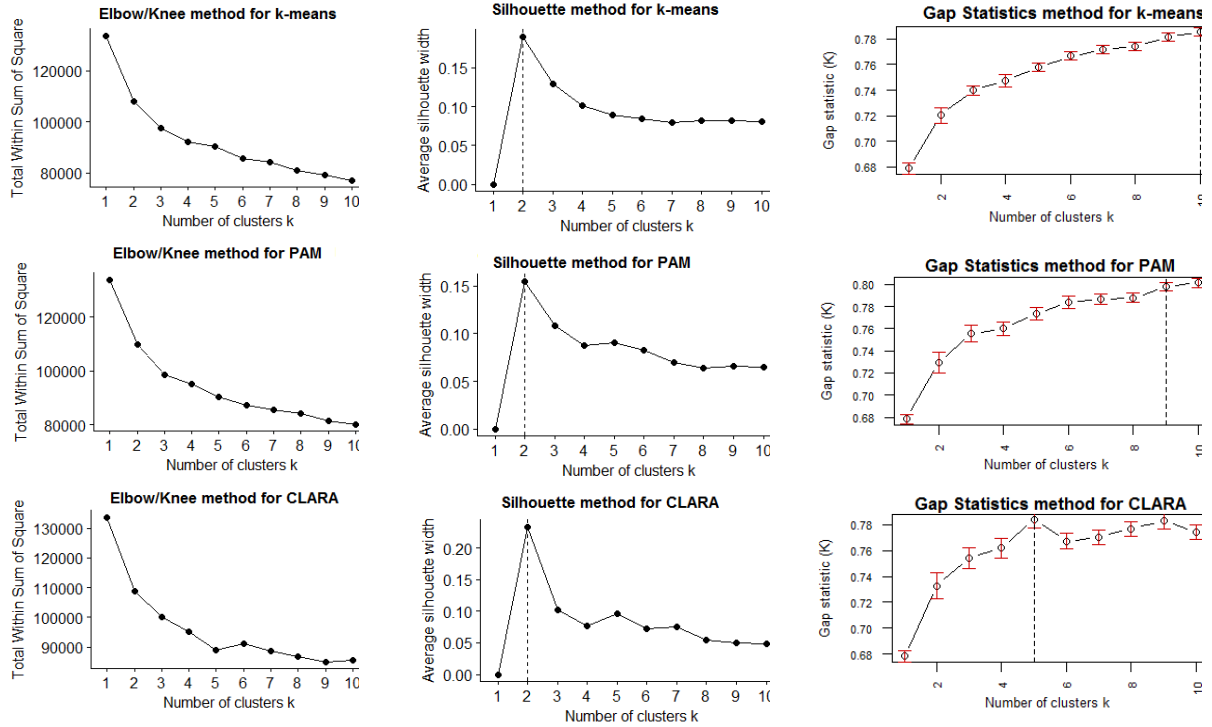

**Fig. S13:** Graphs suggesting optimal number of clusters ( $k$ ) estimated by non-hierarchical partitioning functions namely k-means, PAM and CLARA; indicators for the optimal number of clusters ( $k$ ) are the total within sum of squares in the ‘Elbow/Knee’ method, the average silhouette width in the ‘Silhouette’ method, and gap statistics (K) in the ‘Gap-stat’ method. The graphs for the Elbow method (left panel) in all partitioning functions do not show any clear indication of sharp turning; the Silhouette method (middle panel) consistently suggests two as the optimal number of clusters; and the Gap statistics method (right panel) proposes different cluster numbers ( $k$ ) ranging between 5 to 10 for different partitioning functions.

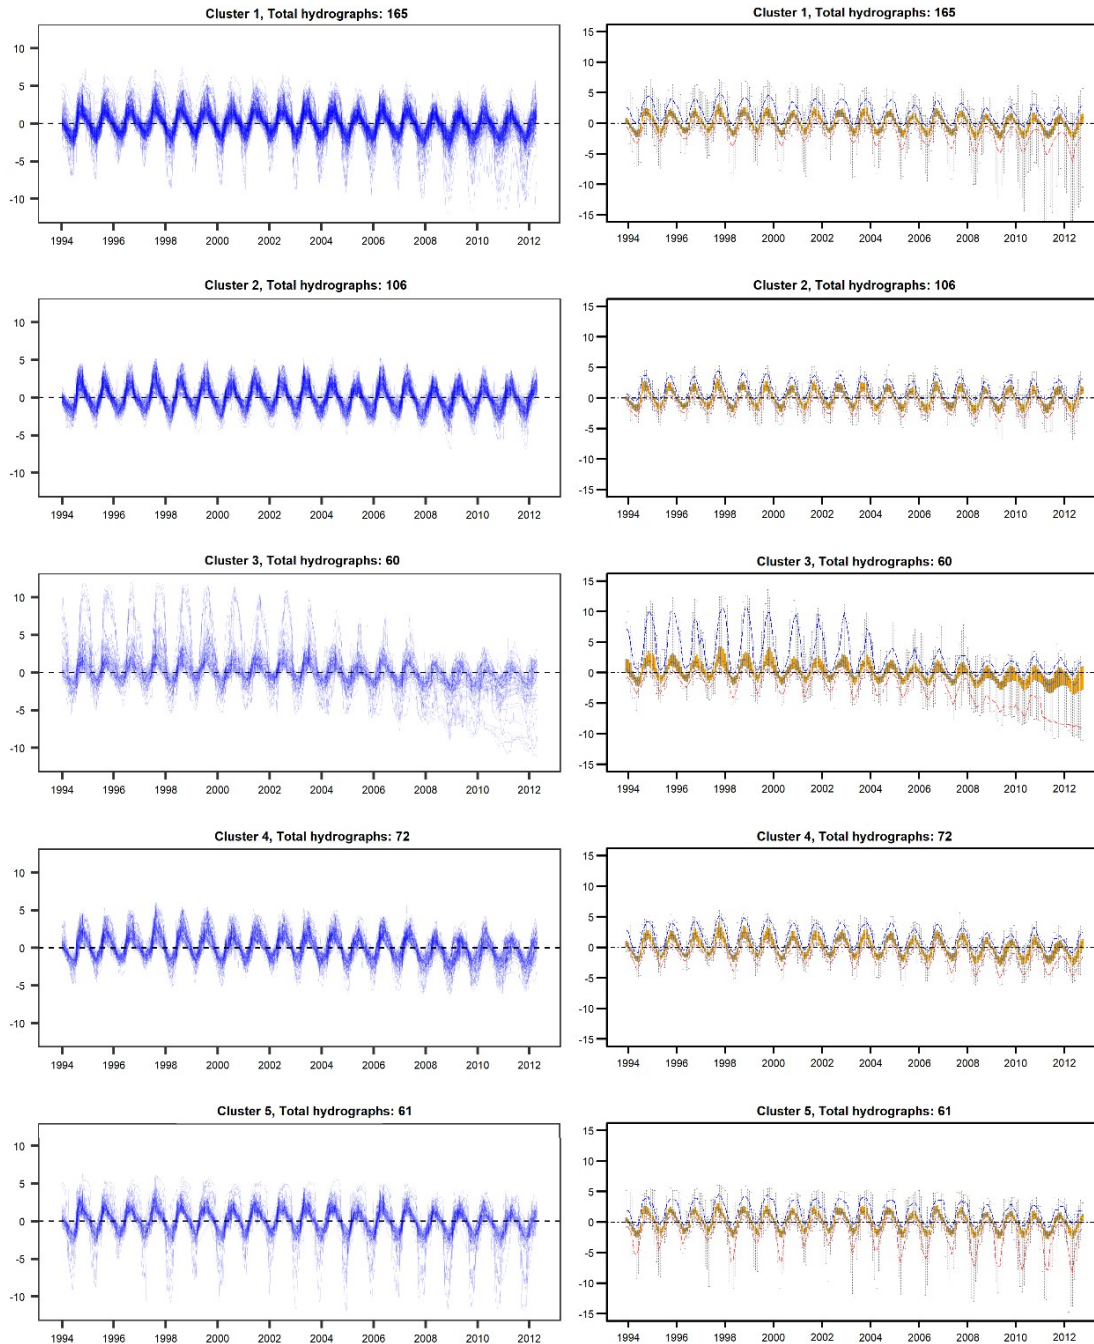

**Fig. S14** Time series of all groundwater hydrographs against the long-term (1994-2013) mean for each of the five hierarchical clusters using Ward.D2 Linkage with pre-defined Canberra function (left panel); Boxplots showing median (grey), 5th percentile (red) and 95th percentile (blue) of groundwater level time series of each of the said clusters (right panel).

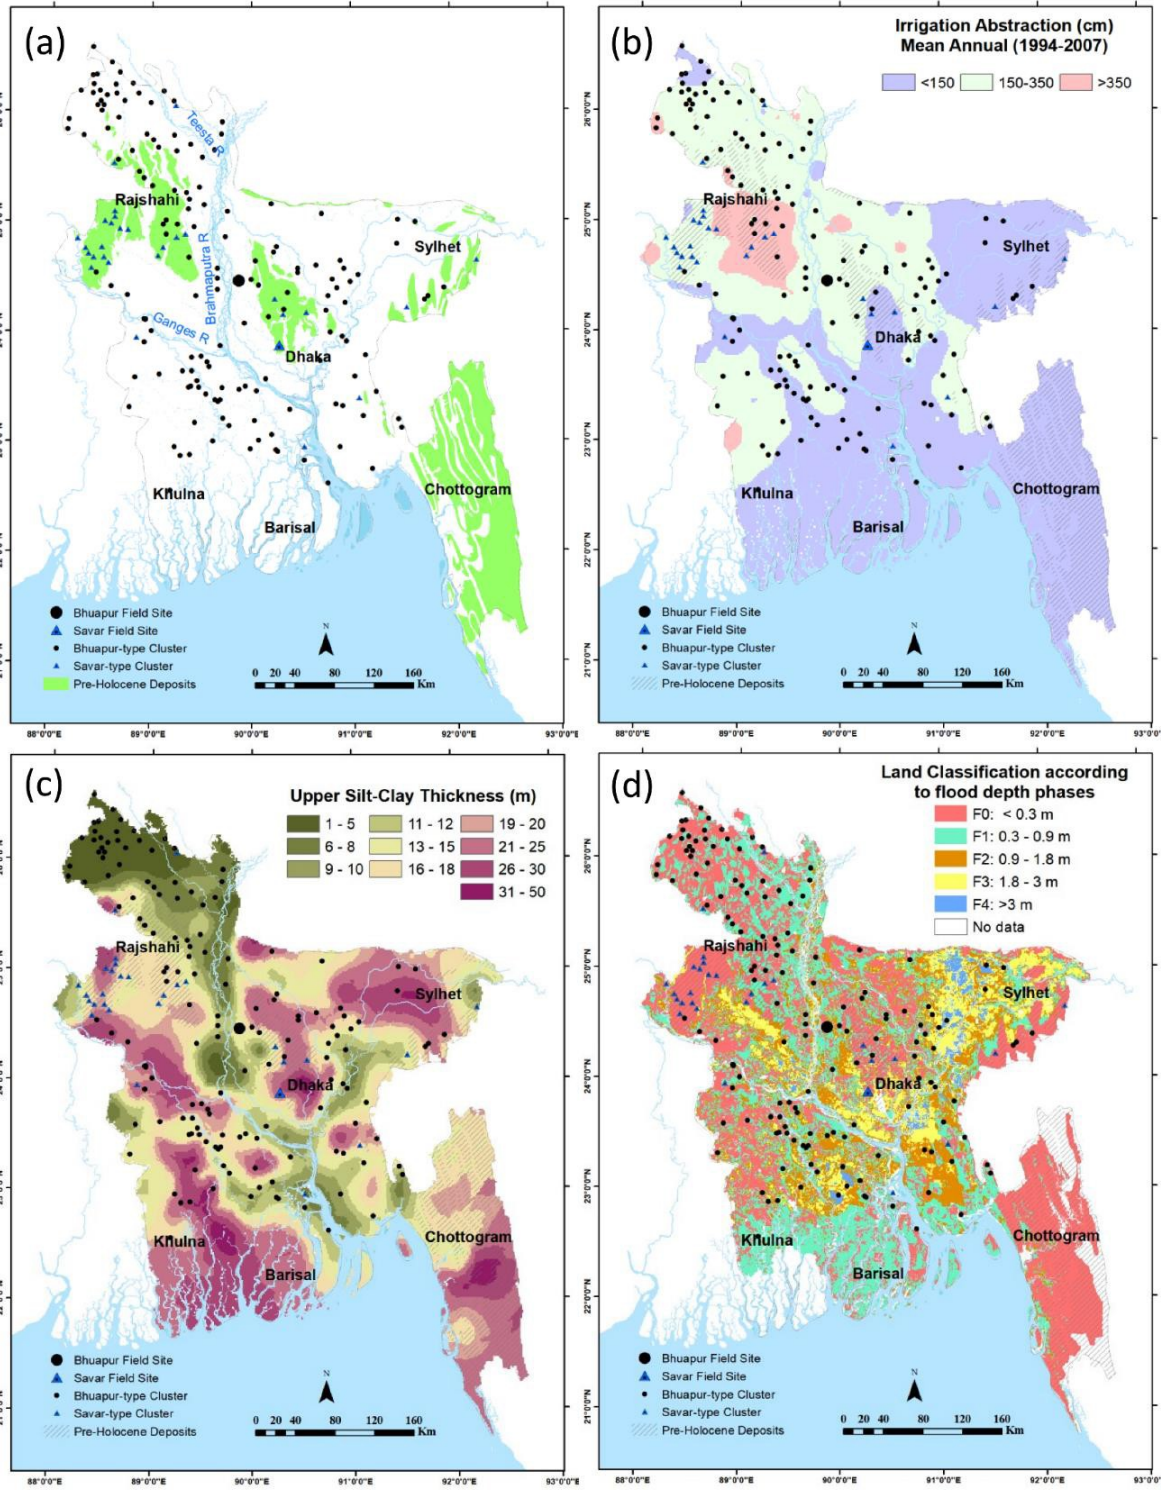

**Fig. S15** Maps of Bangladesh showing the distribution of sites with monitoring-well records showing Bhuapur-type (CL1) and Savar-type (CL3) statistical clusters overlaid on (a) surface geology, (b) irrigation abstraction, (c) upper silt-clay thickness, and (d) annual flood depth phases (see caption for Table S2 for definition of these).

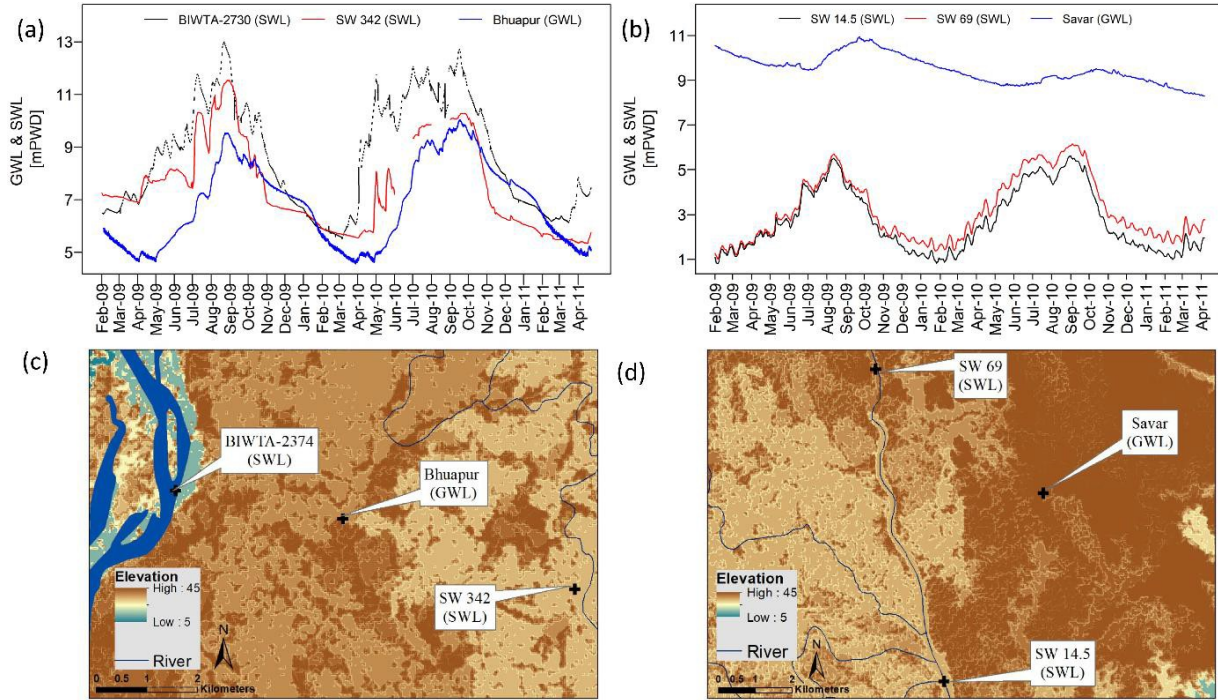

**Fig. S16** Time-series plots of recorded hydraulic heads over a period of 2009 to 2011: (a) groundwater levels at Bhuapur and surface water heads of River Brahmaputra (station number BIWTA-2374) and River Futikjani (station number SW 342), (b) groundwater levels at Savar and surface water levels of River Bangshi (station number SW 69) and River Dhaleswari (station number SW 14.5). Maps show the locations of monitoring gauges at (c) Bhuapur and (d) Savar. Note that both elevations for high-resolution monitoring sites were recorded using a hand-held GPS and cross-checked with the SRTM elevation model data; these present considerably greater uncertainty in absolute elevation than the Public Works Datum (PWD) established by the Bangladesh Water Development Board. Savar is located on an elevated plateau thus showing elevated heads compared to the surface water monitoring sites that are in lowlands.
